# Supplementary material for: Health and Functional Outcomes for Shared and Unique Variances of Interpersonal Callousness and Low Prosocial Behavior
Source: J Psychopathol Behav Assess. Author manuscript; Available in PMC 2021 Jan 5. (PMC7116552; doi:10.1007/s10862-019-09756-9)
Supplement: Supplementary material [file EMS108872-supplement-Supplementary_material.xlsx]

## Sheet: SI List
	ONLINE SUPPLEMENTARY MATERIAL
	Health and functional outcomes for shared and unique variances of interpersonal callousness and low prosocial behavior
	List of supplementary material:
	Supplementary Tables
	Table S1	Delinquency item descriptions at each age of measurement
	Table S2	Intercorrelations between latent study variables for Model A (emotional problems)
	Table S3	Intercorrelations between latent study variables for Model B (physical health problems)
	Table S4	Intercorrelations between latent study variables for Model C (NEET status)
	Table S5	Total, indirect and direct effects for the three path models
	Supplementary Figures
	Fig. S1	Factor structures for the latent variables in Model A (emotional problems)
	Fig. S2	Factor structures for the latent variables in Model B (physical health problems)
	Fig. S3	Factor structures for the latent variables in Model C (NEET status)

## Sheet: Table S1 - Delinquency Items
	Table S1 Delinquency item descriptions at each age of measurement
	Age 13			Age 15			Age 17			Age 18
	1	Skipping or bunking off school		1	Travelling on a bus or train without paying enough/using someone else’s pass		1	Buying something knowing or suspecting it was stolen		1	Being so loud/rowdy/unruly in a public place that people complained or you got into trouble
	2	Breaking into a car or van to try and steal something out of it		2	Writing or spraying paint on property that did not belong to you		2	Stealing something from a shop or store		2	Stealing something from a shop or store
	3	Hitting/kicking/punching/attacking someone with the intention of really hurting them		3	Stealing something from a shop or store		3	Purposefully damaging or destroying property that did not belong to you		3	Buying something knowing or suspecting it was stolen
	4	Purposefully setting fire, or trying to set fire, to property or a building		4	Selling an illegal drug to someone		4	Hitting or picking on someone because of their race or skin colour		4	Breaking into a car or van to try and steal something out of it
	5	Taking money, or something else that did not belong to you, from home without permission		5	Riding in a stolen car or van, or on a stolen motorbike		5	Breaking into a car or van to try and steal something out of it		5	Taking and/or driving a vehicle without owner's permission
	6	Using force, threats or a weapon to get money or something else from somebody		6	Breaking into a car or van to try and stealing something out of it		6	Taking and/or driving a vehicle without owner's permission		6	Breaking into a house or building to try and steal something
	7	Writing things or spraying paint on a property not belonging to you		7	Breaking into a house or building to try and steal something		7	Selling an illegal drug to someone		7	Stealing something someone was holding/carrying/wearing at the time
	8	Breaking into a house or building to try and steal something		8	Hitting/kicking/punching/attacking someone with the intention of really hurting them		8	Breaking into a house or building to try and steal something		8	Hitting/kicking/punching/attacking someone with the intention of really hurting them
	9	Purposefully damaging or destroying property that did not belong to you		9	Purposefully damaging or destroying property that did not belong to you		9	Hitting/kicking/punching/attacking someone with the intention of really hurting them		9	Deliberately damaging or destroying property that did not belong to you on purpose
	10	Carrying a knife/other weapon for protection/in case it was needed in a fight		10	Selling something that didn’t belong to you or that you knew was stolen		10	Selling something that didn’t belong to you or that you knew was stolen		10	Hurting/injuring animals or birds on purpose
	11	Taking money or something else that did not belong to you from school		11	Stealing money/property that someone was holding/carrying/wearing at the time		11	Stealing money/property that someone was holding/carrying/wearing at the time		11	Carrying a knife/other weapon for protection/in case needed in a fight
	12	Stealing or riding in a stolen car or van, or on a stolen motorbike		12	Hitting or picking on someone because of their race or skin color		12	Hurting/injuring animals or birds on purpose		12	Using stolen cheque book/credit card
	13	Being so loud/rowdy/unruly in a public place that people complained or got into trouble		13	Hurting/injuring animals or birds on purpose		13	Purposefully setting fire to something
	14	Stealing something from a shop or store		14	Purposefully setting fire, or trying to set fire, to something		14	Claiming social security or housing benefits that you were not entitled to
	15	Travelling on a bus or train without paying enough/using someone else’s pass		15	Carrying a knife/other weapon for protection/in case it was needed in a fight		15	Carrying a knife/other weapon for protection/in case it was needed in a fight
				16	Being so loud/rowdy/unruly in a public place that people complained or you got into trouble		16	Being so loud/rowdy/unruly in a public place that people complained or got into trouble
							17	Using stolen cheque book/credit card
		Note. * p< .05; ** p< .01; *** p< .001.

## Sheet: Table S2 - Model A Correlations
	Table S2 Intercorrelations between latent study variables for Model A (emotional problems)
	Variable	1	2	3	4	5	6	7	8	9	10	11	12	13
	1. Adversity	–	-.114***	.144***	-0.015	.151***	.119***	.125***	.098***	.135***	-.159***	.140***	.143***	.168***
	2. IQ		–	-.099***	.071*	-0.032	0.001	0.001	0.001	0.001	.161***	-.051**	-.051**	-.060**
	3. IC/LPB			–	-0.008	.225***	.184***	.194***	.153***	.210***	-.105**	.109***	.111***	.131***
	4. LPB				–	-0.007	-0.037	-0.039	-0.03	-0.042	0.029	-.084**	-.086**	-.101**
	5. Delinquency					–	.646***	.680***	.535***	.736***	-0.051	.187***	.192***	.225***
	6. Tobacco use						–	.812***	.639***	.878***	-.140***	.162***	.167***	.196***
	7. Cannabis use							–	.673***	.924***	-.147***	.171***	.175***	.206***
	8. Alcohol use								–	.728***	-.116***	.135***	.138***	.162***
	9. Substance use									–	-.159***	.185***	.190***	.223***
	10. Physical activity										–	-.137***	-.140***	-.165***
	11. Emotional symptoms											–	.708***	.831***
	12. Role emotional												–	.852***
	13. Emotional problems													–
	Note. n = 2,541. * p< .05; ** p< .01; *** p< .001.

## Sheet: Table S3 - Model B Correlations
	Table S3 Intercorrelations between latent study variables for Model B (physical health problems)
	Variable	1	2	3	4	5	6	7	8	9	10	11	12	13
	1. Adversity	–	-.114***	.148***	-0.018	.145***	.121***	.127***	.100***	.138***	-.158***	.092***	.084***	.129***
	2. IQ		–	-.098***	.074*	-0.024	0.005	0.005	0.004	0.006	.155***	-.170***	-.155***	-.238***
	3. IC/LPB			–	-0.009	.228***	.188***	.198***	.156***	.214***	-.102**	0.03	0.028	0.042
	4. LPB				–	-0.011	-0.039	-0.041	-0.033	-0.045	0.032	-.110***	-.100***	-.153***
	5. Delinquency					–	.643***	.675***	.533***	.732***	-0.042	.074**	.068*	.104**
	6. Tobacco use						–	.809***	.639***	.878***	-.132***	.054**	.050*	.076*
	7. Cannabis use							–	.671***	.922***	-.138***	.057**	.052*	.080*
	8. Alcohol use								–	.728***	-.109***	.045**	.041*	.063*
	9. Substance use									–	-.150***	.062**	.056*	.087*
	10. Physical activity										–	-.137***	-.125***	-.191***
	11. Physical functioning											–	.466***	.714***
	12. Role physical												–	.652***
	13. Physical health problems													–
	Note. n = 2,534. * p< .05; ** p< .01; *** p< .001.

## Sheet: Table S4 - Model C Correlations
	Table S4 Intercorrelations between latent study variables for Model C (NEET status)
	Variable	1	2	3	4	5	6	7	8	9	10	11
	1. Adversity	–	-.102***	.199***	-.056***	.128***	.100***	.108***	.078***	.112***	-.163***	.210***
	2. IQ		–	-.092***	0.049	0.028	.042*	.045*	.032*	.046*	.150***	-.229***
	3. IC/LPB			–	-0.01	.240***	.195***	.213***	.150***	.217***	-.116***	.207***
	4. LPB				–	-0.01	-.073*	-.079*	-.056*	-.081*	0.045	0.003
	5. Delinquency					–	.673***	735***	.517***	.748***	-.070*	.148***
	6. Tobacco use						–	.884***	.621***	.899***	-.165***	.092*
	7. Cannabis use							–	.679***	.983***	-.181***	.101*
	8. Alcohol use								–	.691***	-.127***	.071*
	9. Substance use									–	-.184***	.103*
	10. Physical activity										–	-.138**
	11. NEET status											–
	Note. n = 3,077. * p< .05; ** p< .01; *** p< .001.

## Sheet: Table S5 - Indirect Effects
	Table S5 Total, indirect and direct effects for the three path models
		Emotional problems					Physical health problems					NEET status
		Std B	SE	p-value	Bootstrapped 95% CIs		Std B	SE	p-value	Bootstrapped 95% CIs		Std B	SE	p-value	Bootstrapped 95% CIs
	IC/LPB
	Total effect	0.106	0.032	0.001	.044 – .168		0.015	0.034	0.654	-.051 – .081		.169	0.042	<.001	.088 – .251
	Total indirect effect	0.051	0.01	<.001	.032 – .070		0.039	0.014	0.004	.013 – .066		0.028	0.012	0.015	.005 – .051
	Specific indirect effects
	via delinquency	0.028	0.013	0.034	.002 – .054		0.023	0.018	0.198	-.012 – .057		.031	0.019	0.1	-.006 – .068
	via substance use	0.015	0.012	0.202	-.008 – .038		.000	0.013	0.984	-.026 – .026		-.009	0.018	0.602	-.045 – .026
	via physical activity	0.009	0.005	0.066	-.001 – .018		.017	0.007	0.009	.004 – .030		0.007	0.005	0.2	-.004 – .017
	Direct effect	0.055	0.033	0.099	-.010 – .120		-.024	0.035	0.493	-.093– .045		0.141	0.045	0.002	.054 – .228
	LPB
	Total effect	-0.096	0.034	0.004	-.161 – -.030		-.142	0.037	<.001	-.214 – -.069		.018	0.049	0.719	-.078 – .114
	Total indirect effect	-0.006	0.01	0.569	-.025 – .014		-.002	0.008	0.68	-.018 – .013		.000	0.009	0.986	-.018 – .018
	Specific indirect effects
	via delinquency	-0.001	0.006	0.931	-.012 – .011		.001	0.003	0.837	-.004 – .007		-.001	0.006	0.878	-.013 – .011
	via substance use	-0.003	0.004	0.458	-.011 – .005		.000	0.004	0.758	-.007 – .007		.004	0.008	0.645	-.012 – .019
	via physical activity	-0.002	0.005	0.693	-.012 – .008		-.004	0.006	0.611	-.015 – .008		-.003	0.004	0.495	-.011 – .005
	Direct effect	-0.09	0.033	0.006	-.155 – -.025		-.140	0.038	<.001	-.214 – -.066		.018	0.05	0.72	-.079 – .115
	Note. Standardised coefficients (Std B) are presented. Significant effects are bolded. CIs = confidence intervals (bootstrapped with 10,000 resamples); NEET = not in education, employment, or training.

## Sheet: Fig S1 - Model A Latent Factors
	Fig. S1 Factor structures for the latent variables in Model A (emotional problems)
	Note. Standardized path coefficients are presented here. Pink circles represent the latent variables between which direct and indirect effects were estimated. Solid lines indicate significant pathways (p < .05). Broken lines denote non-significant pathways (i.e., p > .05).

## Sheet: Fig S2 - Model B Latent Factors
	Fig. S2 Factor structures for the latent variables in Model B (physical health problems)
	Note. Standardized path coefficients are presented here. Pink circles represent the latent variables between which direct and indirect effects were estimated. Solid lines indicate significant pathways (p < .05). Broken lines denote non-significant pathways (i.e., p > .05).

## Sheet: Fig S3 - Model C Latent Factors
	Fig. S3 Factor structures for the latent variables in Model C (NEET status)
	Note. Standardized path coefficients are presented here. Pink circles represent the latent variables between which direct and indirect effects were estimated. Solid lines indicate significant pathways (p < .05). Broken lines denote non-significant pathways (i.e., p > .05).
